# Supplementary material
Source: PubMed Central journal article supplement (PMC8412796)

# THE LANCET

## Diabetes & Endocrinology

### Supplementary appendix

This appendix formed part of the original submission. We post it as supplied by the authors.

Supplement to: Valabhji J, Barron E, Bradley D. Effect of the COVID-19 pandemic on body weight in people at high risk of type 2 diabetes referred to the English NHS Diabetes Prevention Programme. *Lancet Diabetes Endocrinol* 2021; published online September 2. [http://dx.doi.org/10.1016/S2213-8587\(21\)00218-7](http://dx.doi.org/10.1016/S2213-8587(21)00218-7).

## **Appendix**

Participant characteristics: age; sex; ethnicity; and deprivation were identified as confounding factors and recorded. Age was grouped as 18-39 years, 40-64 years, 65-74 years and 75 years and over. Sex was recorded as male or female. Ethnicity was recorded as white, Asian, black, mixed or other. Deprivation was defined by the English Index of Multiple Deprivation (IMD) 2019 associated with the Lower Layer Super Output Area derived from the patient's postcode and grouped into quintiles (from 1 = most deprived to 5 = least deprived) (A1). Sex, ethnicity and deprivation also include an unknown category where either the participant declined to give the relevant information, or a value was not recorded.

Temporal variations in baseline weight were assessed using multivariable linear regression models with baseline weight as the dependent variable and time period (2017-20 and 2020-21) and participant characteristics (age, sex, ethnicity and deprivation) as independent variables. Adjusted mean weight change was determined using the coefficient for time period; for example, a coefficient of +0.5 for 2020-21 relative to 2017-20 was interpreted as a 0.5kg increase in baseline weight between the two time periods. We fitted a number of models. The first model used age, sex, ethnicity, deprivation and time period as independent variables and was used to estimate the overall adjusted mean weight difference. We then added interaction terms between patient characteristics and time period to test for associations between temporal differences and characteristics. These interaction models were used to estimate the adjusted mean weight difference for each characteristic in 2020-21 compared to 2017-20.

Statistical significance was defined as  $p < 0.05$  and confidence intervals were set at 95%. All data were analysed with Stata, version 16.

## **Appendix Reference**

A1. English indices of deprivation 2019 [Internet]. 2019 [cited 2021 Mar 24]. Available from: <https://www.gov.uk/government/statistics/english-indices-of-deprivation-2019>

## Supplementary Material

### S1: Number of participants with valid weight data at entry to the NHS Diabetes Prevention

#### Programme, 2017-20 and 2020-21

|                        | Number of participants |         | Number of participants with valid data |         | Percentage with valid data |         |
|------------------------|------------------------|---------|----------------------------------------|---------|----------------------------|---------|
|                        | 2017-20                | 2020-21 | 2017-20                                | 2020-21 | 2017-20                    | 2020-21 |
| Total                  | 217,181                | 72,611  | 208,054                                | 46,069  | 96%                        | 63%     |
| < 40                   | 7,512                  | 5,084   | 7,169                                  | 3,258   | 95%                        | 64%     |
| 40 – 64                | 88,308                 | 37,855  | 84,641                                 | 24,180  | 96%                        | 64%     |
| 65 – 74                | 76,870                 | 19,367  | 73,703                                 | 12,402  | 96%                        | 64%     |
| 75+                    | 44,491                 | 10,305  | 42,541                                 | 6,229   | 96%                        | 60%     |
| Male                   | 97,505                 | 31,492  | 93,464                                 | 20,253  | 96%                        | 64%     |
| Female                 | 119,207                | 41,068  | 114,142                                | 25,776  | 96%                        | 63%     |
| Indeterminate/unknown  | 469                    | 51      | 448                                    | 40      | 96%                        | 78%     |
| Asian                  | 24,015                 | 9,602   | 23,228                                 | 5,752   | 97%                        | 60%     |
| Black                  | 12,590                 | 6,193   | 12,073                                 | 3,163   | 96%                        | 51%     |
| Mixed                  | 3,544                  | 1,495   | 3,422                                  | 883     | 97%                        | 59%     |
| Other                  | 3,196                  | 1,016   | 3,071                                  | 576     | 96%                        | 57%     |
| White                  | 159,435                | 51,489  | 152,775                                | 34,232  | 96%                        | 66%     |
| Unknown                | 14,401                 | 2,816   | 13,485                                 | 1,463   | 94%                        | 52%     |
| IMD 1 (most deprived)  | 36,407                 | 11,802  | 34,899                                 | 7,615   | 96%                        | 65%     |
| IMD 2                  | 40,007                 | 14,033  | 38,295                                 | 8,494   | 96%                        | 61%     |
| IMD 3                  | 43,574                 | 15,177  | 41,715                                 | 9,494   | 96%                        | 63%     |
| IMD 4                  | 46,218                 | 15,515  | 44,176                                 | 9,997   | 96%                        | 64%     |
| IMD 5 (least deprived) | 50,658                 | 16,029  | 48,670                                 | 10,428  | 96%                        | 65%     |
| Unknown                | 317                    | 55      | 299                                    | 41      | 94%                        | 75%     |

### S2: Mean weight (kg) at entry to the NHS Diabetes Prevention Programme between April 2017

#### and March 2021

|         | Number of participants | Mean baseline weight measurement (kgs) | 95% CI lower | 95% CI upper |
|---------|------------------------|----------------------------------------|--------------|--------------|
| 2017-18 | 38,372                 | 84.0                                   | 83.8         | 84.2         |
| 2018-19 | 71,573                 | 84.1                                   | 84.0         | 84.3         |
| 2019-20 | 98,109                 | 84.7                                   | 84.6         | 84.8         |
| 2020-21 | 46,069                 | 86.8                                   | 86.6         | 87.0         |

**S3. Mean monthly baseline weights (with 95% confidence intervals) at entry to the NHS Diabetes Prevention Programme between April 2017 and March 2021.**

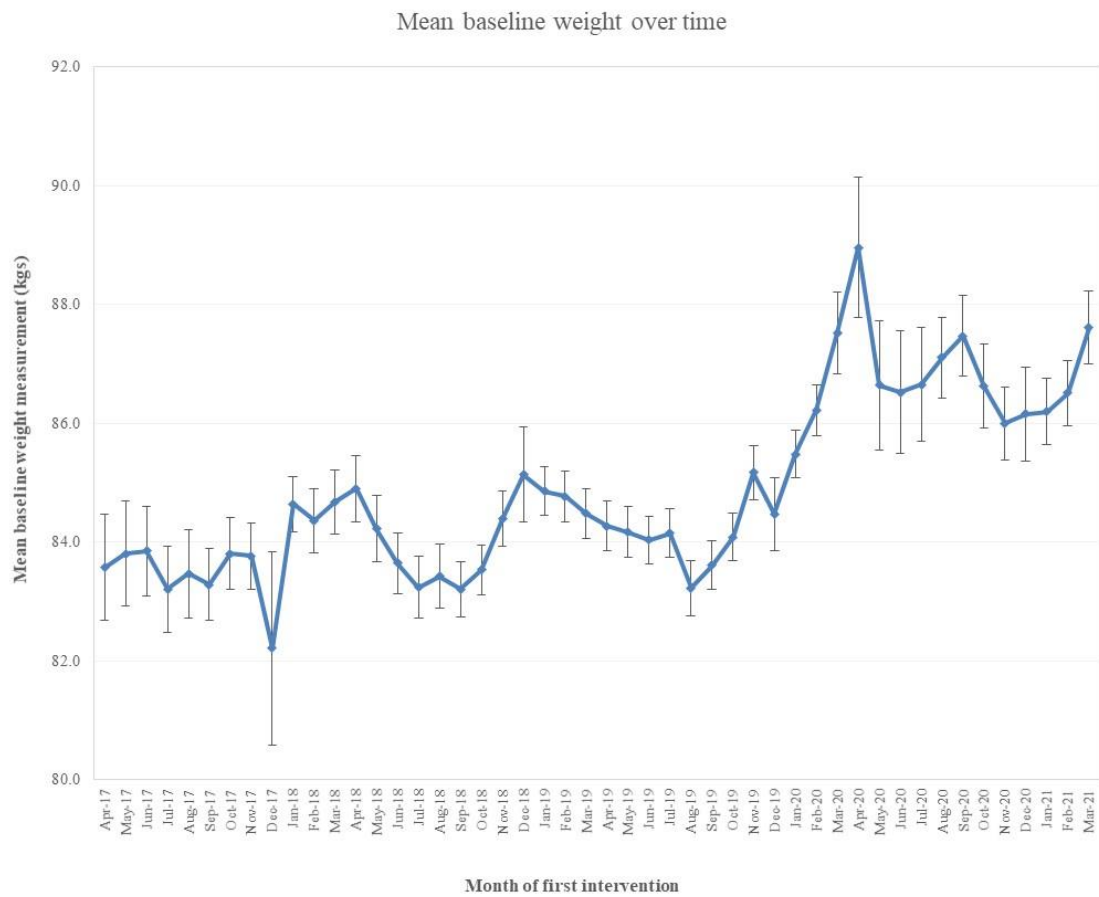

Supplement: mmc1.pdf [file mmc1.pdf]
